# Supplementary material for: Adsorption and photocatalytic desorption toward Cr(vi) over defect-induced hierarchically porous UiO-66-(OH)2: a sustainable approach
Source: Royal Society of Chemistry journal article supplement (doi:10.1039/d2en01035f), 2023-01-01
Supplement: d2en01035f1.pdf [file d2en01035f1.pdf]

## Supplemental Information for:

### Adsorption and photocatalytic desorption toward Cr(VI) over defect-induced hierarchically porous UiO-66-(OH)<sub>2</sub>: A sustainable approach

Yu-Hang Li<sup>1,2</sup>, Meng-Yuan Liu<sup>1,2</sup>, Yu-Wei Wei<sup>1,2</sup>, Chong-Chen Wang<sup>1,2,\*</sup>, Peng Wang<sup>1,2</sup>

<sup>1</sup> Beijing Key Laboratory of Functional Materials for Building Structure and Environment Remediation, School of Environment and Energy Engineering, Beijing University of Civil Engineering and Architecture, Beijing 100044, China.

<sup>2</sup> Beijing Energy Conservation & Sustainable Urban and Rural Development Provincial and Ministry Co-construction Collaboration Innovation Center, Beijing University of Civil Engineering and Architecture, Beijing 100044, China.

Number of Pages: 24

Number of Text Sections: 6

Number of Tables: 6

Number of Figures: 11

---

\*Corresponding author.

*E-mail address:* [wangchongchen@bucea.edu.cn](mailto:wangchongchen@bucea.edu.cn), [chongchenwang@126.com](mailto:chongchenwang@126.com) (C.-C. Wang).

## Section S1. Chemicals

Zirconium (IV) chloride ( $ZrCl_4$ , purity  $\geq 99\%$ ), 2,5-Dihydroxyterephthalic acid ( $H_2BDC-(OH)_2$ , purity  $\geq 98\%$ ) ammonium metavanadate ( $NH_4VO_3$ , purity  $\geq 99\%$ ) and potassium perrhenate ( $KReO_4$ , purity  $\geq 98\%$ ) were brought from J&K company. benzoic acid (BA, purity  $\geq 99\%$ ) was purchased from MACKUIN company. Dimethylformamide (DMF), hydrochloric acid (HCl), methanol (MeOH), acetic acid (purity  $\geq 99.5\%$ ) were obtained from Tianjin Fu Chen Chemical Co., Ltd. (China). Sodium arsenite ( $NaAsO_2$ , purity  $\geq 90\%$ ) was brought from ALDRICH Chemistry Co., Ltd. (China). Potassium dichromate ( $K_2Cr_2O_7$ , analytically pure) was brought from Beijing Chemical Reagent Co., Ltd. (China). All chemicals were directly used without further purification.

## Section S2. Characterizations

The powder X-ray diffraction (PXRD) patterns were obtained on a DX-2700B X-ray diffractometer using Cu  $K\alpha$  radiation. Fourier transform infrared spectra (FTIR) were measured by a Nicolet 6700 infrared spectrophotometer with KBr pellets. The thermogravimetric analyses-differential scanning calorimetry (TGA-DSC) was measured by Mettler-Toledo TGA/DSC 3+ and Elementar Vario EL cube, respectively. The surface area and pore size distribution were obtained on a micromeritics ASAP 2460 at 77 K adopting the Brunauer-Emmett-Teller (BET) method. The scanning electron microscope (SEM) and high-resolution transmission electron microscope (HR-TEM) were acquired by SU8020, JEM 1200EX and Tecnai G2 F20, respectively. Photoluminescence (PL) emission spectra were tested on Hitachi F-7000 spectrophotometer in the range of 300-600 nm at room temperature with an excitation wavelength of 369 nm. High-resolution X-ray photoelectron spectra (XPS) measurement was

performed on a Thermo ESCALAB 250XI. UV-Vis diffuse reflectance spectra (UV-Vis DRS) were tested on a PerkinElmer Lambda 650S spectrophotometer with BaSO<sub>4</sub> as the reference.

### Section S3. UiO-66-(OH)<sub>2</sub> Synthesis

UiO-66-(OH)<sub>2</sub> was synthesized according to a reported with a minor modification. Particularly, the solutions of 0.1716 mmol ZrCl<sub>4</sub> (40.0 mg) and 0.1716 mmol ligand (2,5-Dihydroxyterephthalic acid (33.99 mg)) dissolved in 10.0 mL N,N-dimethylformamide (DMF). Then, 3.0 mL acetic acid was added to the mixed solution. The mixed solution was transferred into a 25.0 mL Teflon lined autoclave, followed by heating at 120 °C for 24 h. Then, the generated powder was washed with methyl alcohol four times and dried at 60 °C for 12 h.

### Section S4. Batch adsorption experiments

The Cr(VI) adsorption experiments were performed by using K<sub>2</sub>Cr<sub>2</sub>O<sub>7</sub> as the model pollution. H<sub>2</sub>SO<sub>4</sub> or NaOH solution with appropriate concentration were using to adjust the required pH values of solution. During the sorption process, each 2.0 mL suspension liquid was filtered via using 0.45 μm PTFE membrane at specified time intervals. The adsorption capacity ( $q_e$ ) of adsorbent was calculated by Eq. S1:

$$q_e = \frac{(C_0 - C_e)V}{M} \quad (S1)$$

Where,  $q_e$  (mg g<sup>-1</sup>) was the sorption capacity,  $C_0$  and  $C_e$  (mg L<sup>-1</sup>) represented the initial and equilibrium concentration of Cr(VI), respectively.

As to sorption kinetic experiments, the fresh adsorbent (20.0 mg) was added into the 150.0 mL 30.0 mg L<sup>-1</sup> Cr(VI) solution. Then, the mixed solution was shaken in the constant temperature shaker (HNY-2102C) with the speed of 170 rpm until 240.0 min to reach adsorption-desorption equilibrium at 298 K and pH = 2.0. The pseudo-first-order, pseudo-second-order and

Weber-Morris intraparticle diffusion models were selected to fit the kinetic curves, respectively (SI, Section S5). For sorption isotherms and thermodynamic parameters, the sorption experiments of optimal adsorbent were performed under 288 K, 298 K and 308 K with identical condition. The Langmuir, Freundlich and Dubinin-Radushkevich (D-R) models were used to fit the isotherm curves, respectively (SI, Section S5).

## Section S5. Data Analysis

### Analysis of Adsorption Kinetic Data.

The curves were fitted by using pseudo-first-order model (Eq. S2), pseudo-second-order model (Eq. S3) and Weber-Morris intra-particle diffusion model (Eq. S4).

$$\ln (q_e - q_t) = \ln (q_t) - k_1 t \quad (\text{S2})$$

$$t/q_t = 1/(k_2 \times q_e^2) + t/q_e \quad (\text{S3})$$

$$q_t = kt^{0.5} + C \quad (\text{S4})$$

where  $q_e$  and  $q_t$  (mg g<sup>-1</sup>) were the adsorption capacity at equilibrium and a specific time, respectively.  $k_1$ ,  $k_2$  (min<sup>-1</sup>) and  $k$  (mg g<sup>-1</sup> min<sup>0.5</sup>) respectively represented the rate constant of pseudo-first-order model, pseudo-second-order model, and Weber-Morris models.

### Analysis of Adsorption Isotherms Data.

The adsorption isotherms were fitted using the Langmuir model (Eq. S5), Freundlich model (Eq. S6) and Dubinin-Radushkevich (D-R) model (Eqs. S7, S8 and S9):

$$C_e/q_e = 1/(K_L \times q_m) + C_e/q_m \quad (\text{S5})$$

$$\ln q_e = \ln K_f + (1/n)\ln C_e \quad (\text{S6})$$

$$\ln q_e = \ln q_m - K_{DR}\xi^2 \quad (\text{S7})$$

$$\xi = RT \ln (1 + (1/C_e)) \quad (\text{S8})$$

$$E = 1/(2 \times K_{DR})^{0.5} \quad (S9)$$

where  $C_e$  ( $\text{mg L}^{-1}$ ) was the remaining concentration of Pb(II) at equilibrium.  $K_L$ ,  $K_f$   $K_{D-R}$  and  $n$  respectively represented the constant of different models,  $\xi$  ( $\text{J mol}^{-1}$ ) and  $E$  ( $\text{kJ mol}^{-1}$ ) respectively represented polar potential energy and adsorption free energy.

### Calculation of Thermodynamic Parameters.

All the thermodynamic parameters like  $\Delta G^0$  (the standard free energy change),  $\Delta H^0$  (enthalpy change) and  $\Delta S^0$  (entropy change) were calculated via Eqs. S10 and S11:

$$\ln K_d = \frac{\Delta S^0}{R} - \frac{\Delta H^0}{RT} \quad (S10)$$

$$\Delta G^0 = \Delta H^0 - T\Delta S^0 \quad (S11)$$

where  $R$  ( $8.314 \text{ kJ mol}^{-1} \text{ K}^{-1}$ ) represented the gas constant and  $T$  (K) represented the temperature.

Distribution coefficient  $K_d$  ( $\text{mL g}^{-1}$ ), which is mass-weighted partition coefficient between solid phase and liquid supernatant phase reflecting the selectivity for objective metal ions, was calculated according to the formula:

$$K_d = \frac{C_0 - C_e}{C_e} \times \frac{V}{M} \quad (S12)$$

where,  $C_0$  and  $C_e$  ( $\text{mg L}^{-1}$ ) were the concentrations of Cr(VI) at contact time of initial concentration and final concentration,  $V$  (mL) is the volume of Cr(VI) solution and  $M$  (g) is the mass of adsorbent.

### Section S6. TGA analysis.

Considering the TGA tests were run up to  $800 \text{ }^\circ\text{C}$  under air atmosphere at a heating rate of  $10 \text{ }^\circ\text{C/min}$ . These conditions can ensure the residue of every TGA experiment is  $\text{ZrO}_2$ . In this

case, the reaction equation for the complete combustion of ideal UiO-66-(OH)<sub>2</sub>: Zr<sub>6</sub>O<sub>6</sub>(BDC-(OH)<sub>2</sub>)<sub>6</sub>:

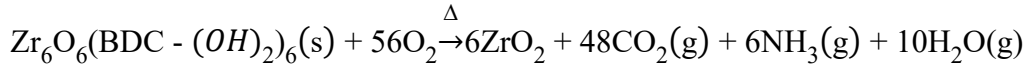

The molar mass of Zr<sub>6</sub>O<sub>6</sub>(BDC-(OH)<sub>2</sub>)<sub>6</sub> was 1833.56 g mol<sup>-1</sup>, which was 2.48 times higher than the solid residue 6.0 mol of ZrO<sub>2</sub> (6×123.22 = 739.34 g mol<sup>-1</sup>). Thus, if the end weight (the mass at 800 °C) of a TGA run on UiO-66-(OH)<sub>2</sub> was normalized to 100 %, the TGA plateau of ideal UiO-66-(OH)<sub>2</sub> (dehydroxylated UiO-66-(OH)<sub>2</sub>, Zr<sub>6</sub>O<sub>6</sub>(BDC-(OH)<sub>2</sub>)<sub>6</sub>) should be found at 248% on the TGA trace. However, it usually fell short than that of the theoretical weight, indicating that the as-prepared UiO-66-(OH)<sub>2</sub> framework was lighter than that formulated in the idealized equation. This finding suggested that the UiO-66-(OH)<sub>2</sub> sample may be linker deficient. It was important to note that the ratio of BDC-(OH)<sub>2</sub>: Zr obtained from TGA represented the mean coordination number, which cannot distinguish missing linker and missing cluster defects. The number of linker deficiencies per Zr<sub>6</sub> formula unit (*x*) was calculated by the following (Eqs. S13, S14 and S15):

$$Wt.PL_{Pre} = \frac{(W_{Pre} - W_{End})}{NL_{Pre}} \quad (\text{S13})$$

$$NL_{Exp} = (6 - x) = \frac{(W_{Exp} - W_{End})}{W_r PL_{Pre}} \quad (\text{S14})$$

$$x = 6 - NL_{Exp} \quad (\text{S15})$$

where: *W*<sub>End</sub> was the end weight of the TGA trace (normalized to 100%), *W*<sub>Pre</sub> was the theoretical weight of the dehydroxylated UiO-66-(OH)<sub>2</sub> (Zr<sub>6</sub>O<sub>6</sub>(BDC-(OH)<sub>2</sub>)<sub>6</sub>: 1833.56 g/mol), *W*<sub>r</sub>*PL*<sub>pre</sub> was a value for the theoretical weight loss per BDC-(OH)<sub>2</sub> linker, 6 was the number of linkers in the ideal Zr-oxo unit, *W*<sub>Exp</sub> was the corresponding experimental value, and *NL*<sub>Exp</sub> was

the number of BDC-(OH)<sub>2</sub> linker in experiment.

**Table S1.** The kinetic models fitting parameters of UiO-66, UiO-66-(OH)<sub>2</sub> and series HP-UOH-*X* toward Cr(VI) adsorption.

| Adsorbents               | Pseudo-first-order model |       |       | Pseudo-second-order model |                      |       | Measured value |
|--------------------------|--------------------------|-------|-------|---------------------------|----------------------|-------|----------------|
|                          | $q_{e1}$                 | $k_1$ | $R^2$ | $q_{e2}$                  | $k_2$                | $R^2$ |                |
| UiO-66                   | 4.34                     | 0.017 | 0.632 | 17.96                     | $1.7 \times 10^{-2}$ | 0.999 | 17.83          |
| UiO-66-(OH) <sub>2</sub> | 67.53                    | 0.013 | 0.995 | 89.85                     | $1.8 \times 10^{-4}$ | 0.993 | 73.22          |
| HP-UOH-20                | 114.29                   | 0.015 | 0.995 | 148.15                    | $1.3 \times 10^{-4}$ | 0.998 | 122.11         |
| HP-UOH-40                | 118.81                   | 0.013 | 0.981 | 164.74                    | $1.5 \times 10^{-4}$ | 0.997 | 145.09         |
| HP-UOH-80                | 131.27                   | 0.015 | 0.984 | 182.15                    | $1.6 \times 10^{-4}$ | 0.999 | 161.76         |
| HP-UOH-160               | 127.42                   | 0.013 | 0.996 | 167.78                    | $1.1 \times 10^{-4}$ | 0.999 | 140.62         |

Postscript:

$q_{e1}, q_{e2}$ : mg g<sup>-1</sup>,  $k_2$ : g·mg<sup>-1</sup> min<sup>-1</sup>,  $k_1$ : min<sup>-1</sup>.



**Table S2.** The Weber-Morris model fitting parameters of UiO-66, UiO-66-(OH)<sub>2</sub> and various HP-UOH-*X* towards Cr(VI) adsorption.

| Adsorbents               | Weber-Morris model |       |       |       |       |       |
|--------------------------|--------------------|-------|-------|-------|-------|-------|
|                          | $k_1$              | $R^2$ | $k_2$ | $R^2$ | $k_3$ | $R^2$ |
| UiO-66                   | 1.57               | 1.000 | —     | —     | 0.07  | 0.832 |
| UiO-66-(OH) <sub>2</sub> | 5.45               | 0.997 | 4.24  | 0.996 | 3.14  | 1.000 |
| HP-UOH-20                | 9.33               | 0.997 | 4.52  | 0.974 | —     | —     |
| HP-UOH-40                | 12.33              | 0.997 | 6.01  | 0.999 | —     | —     |
| HP-UOH-80                | 14.21              | 0.998 | 6.25  | 0.997 | —     | —     |
| HP-UOH-160               | 10.01              | 0.998 | 5.73  | 0.999 | —     | —     |

Postscript:

$k_1, k_2, k_3$ : mg g<sup>-1</sup> min<sup>0.5</sup>.

**Table S3.** Constants of isotherm models of HP-UOH-80 towards Cr(VI) adsorption at various temperatures.

| T (K) | Langmuir model |        |       | Freundlich model |       |       | D-R model             |         |       |
|-------|----------------|--------|-------|------------------|-------|-------|-----------------------|---------|-------|
|       | $K_L$          | $q_m$  | $R^2$ | $K_f$            | $1/n$ | $R^2$ | $K_{DR}$              | $E$     | $R^2$ |
| 288   | 0.164          | 159.23 | 0.995 | 50.41            | 0.278 | 0.996 | $2.38 \times 10^{-6}$ | 458.35  | 0.844 |
| 298   | 0.217          | 226.24 | 0.986 | 69.50            | 0.303 | 0.999 | $4.45 \times 10^{-7}$ | 1059.99 | 0.774 |
| 308   | 0.348          | 284.9  | 0.978 | 92.27            | 0.319 | 0.996 | $7.85 \times 10^{-8}$ | 2523.77 | 0.696 |

Postscript:

$q_m$ : mg g<sup>-1</sup>,  $K_L$ : L mg<sup>-1</sup>,  $K_f$ : L g<sup>-1</sup>,  $E$ : kJ mol<sup>-1</sup>.

**Table S4.** Thermodynamic parameters of the adsorption behavior over HP-UOH-80 towards Cr(VI) adsorption at different temperatures.

| T (K) | $K_d$   | $\Delta G^\circ$ | $\Delta S^\circ$ | $\Delta H^\circ$ |
|-------|---------|------------------|------------------|------------------|
| 288   | 3230.71 | -19.31           |                  |                  |
| 298   | 5314.77 | -21.33           | 201.96           | 38.85            |
| 308   | 9276.19 | -23.35           |                  |                  |

Postscript:

$K_d$ : mL g<sup>-1</sup>,  $\Delta G^\circ$ : kJ mol<sup>-1</sup>,  $\Delta S^\circ$ : J mol<sup>-1</sup> K<sup>-1</sup>,  $\Delta H^\circ$ : kJ mol<sup>-1</sup>.

**Table S5.** The concentration of different inorganic anions and organic matters.

| Parameters                             | Cl <sup>-</sup> | NO <sub>3</sub> <sup>-</sup> | HCO <sub>3</sub> <sup>-</sup> | SO <sub>4</sub> <sup>2-</sup> | H <sub>2</sub> PO <sub>4</sub> <sup>-</sup> | HA  |
|----------------------------------------|-----------------|------------------------------|-------------------------------|-------------------------------|---------------------------------------------|-----|
| Concentration<br>(mg L <sup>-1</sup> ) | 98.25           | 9.25                         | 206                           | 100.25                        | 2.65                                        | 5.0 |

Note: The concentration of the five above-stated factors based on the characteristics of surface water quality in some areas of Beijing.

**Table S6.** Characteristics of tap water and lake water used for Cr(VI) removal by HP-UOH-80.

| Parameters                                          | Tap water | Lake water |
|-----------------------------------------------------|-----------|------------|
| pH                                                  | 2.0       | 2.0        |
| Na <sup>+</sup> (mg L <sup>-1</sup> )               | 10.69     | 37.1       |
| K <sup>+</sup> (mg L <sup>-1</sup> )                | 1.856     | 4.4        |
| Mg <sup>2+</sup> (mg L <sup>-1</sup> )              | 11.64     | 33.3       |
| Ca <sup>2+</sup> (mg L <sup>-1</sup> )              | 47.79     | 69.8       |
| SO <sub>4</sub> <sup>2-</sup> (mg L <sup>-1</sup> ) | 7.47      | 175.1      |
| Cl <sup>-</sup> (mg L <sup>-1</sup> )               | 17.9      | 32.2       |
| NO <sub>3</sub> <sup>-</sup> (mg L <sup>-1</sup> )  | 26.6      | 10.8       |
| F <sup>-</sup> (mg L <sup>-1</sup> )                | 0.182     | NA         |
| PO <sub>4</sub> <sup>3-</sup> (mg L <sup>-1</sup> ) | NA        | 0.38       |

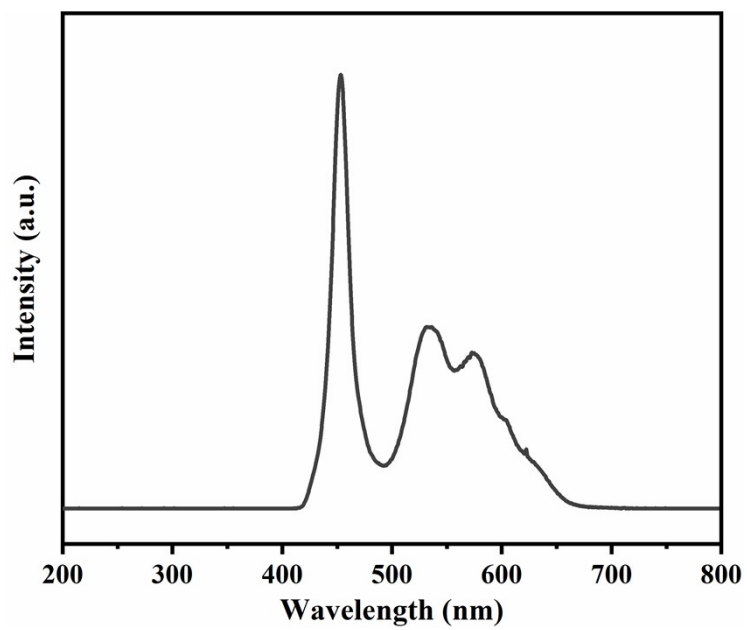

**Fig S1** The spectrum of visible light source.

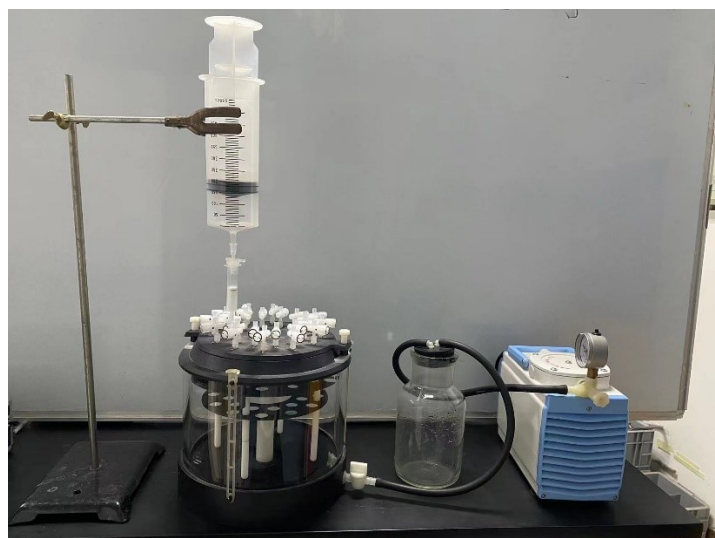

**Fig. S2** The setup picture of the fixed-bed column experiments.

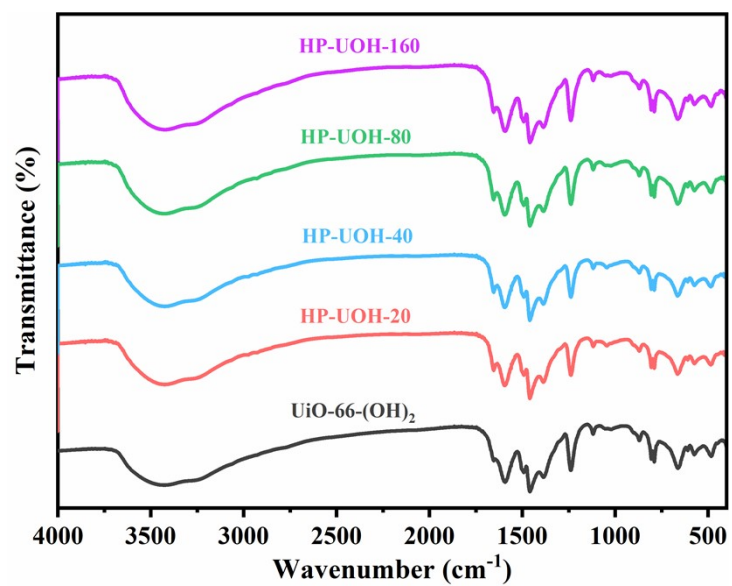

**Fig. S3** FTIR spectra of UiO-66-(OH)<sub>2</sub> and various HP-UOH-*X* samples.



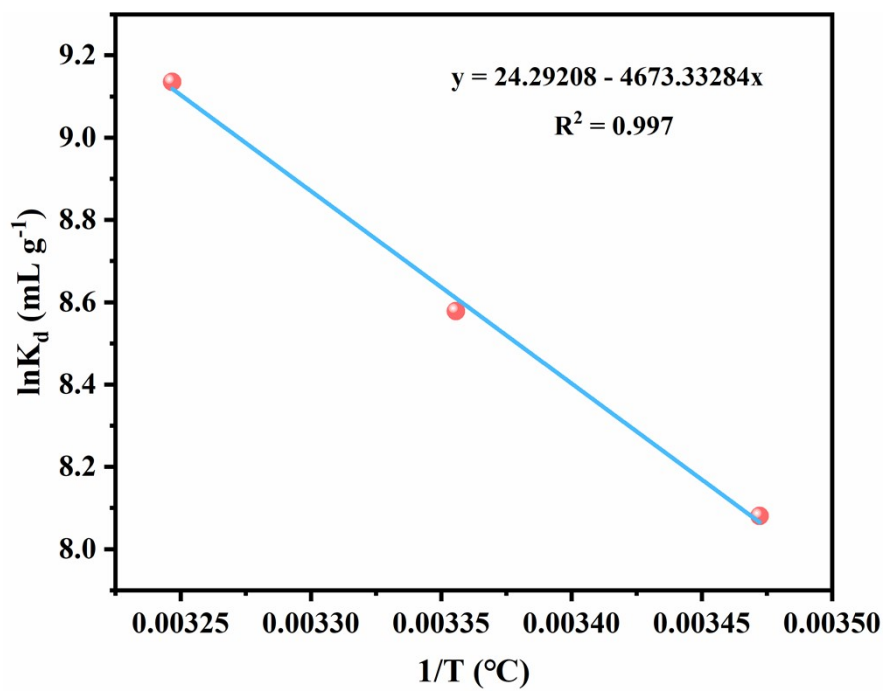

Fig. S4 The straight line obtained from plotting  $\ln K_d$  versus  $1/T$ .

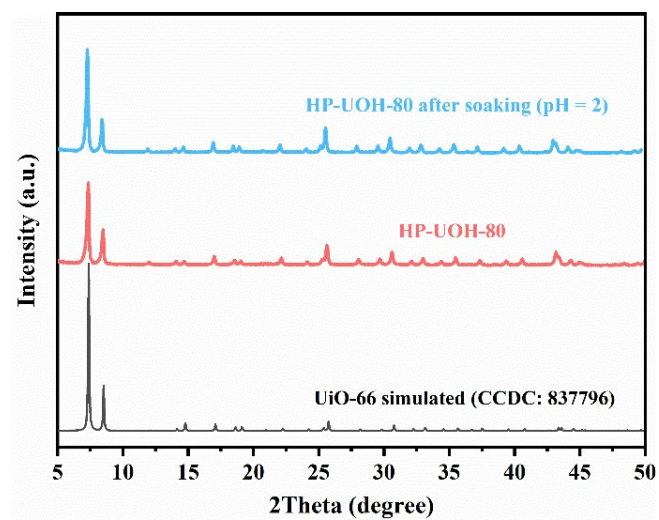

**Fig. S5** The PXR D patterns of pristine HP-UOH-80 and HP-UOH-80 after soaking by acidic solution.

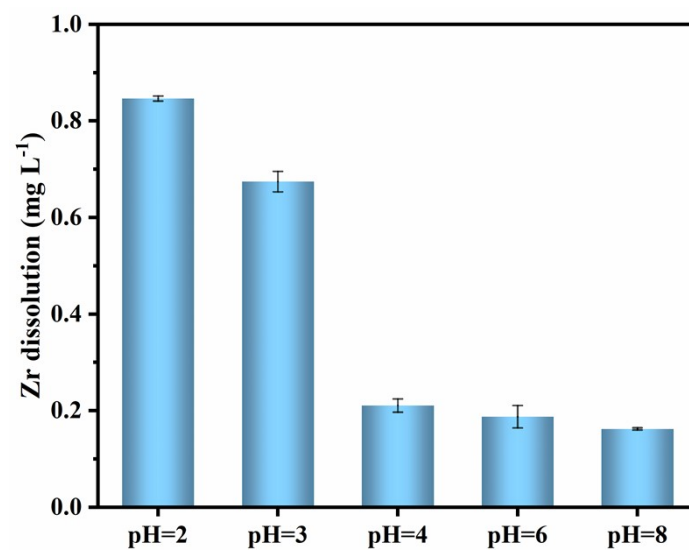

**Fig. S6** The Zr dissolution of HP-UOH-80 in aqueous solution with different initial pH values.

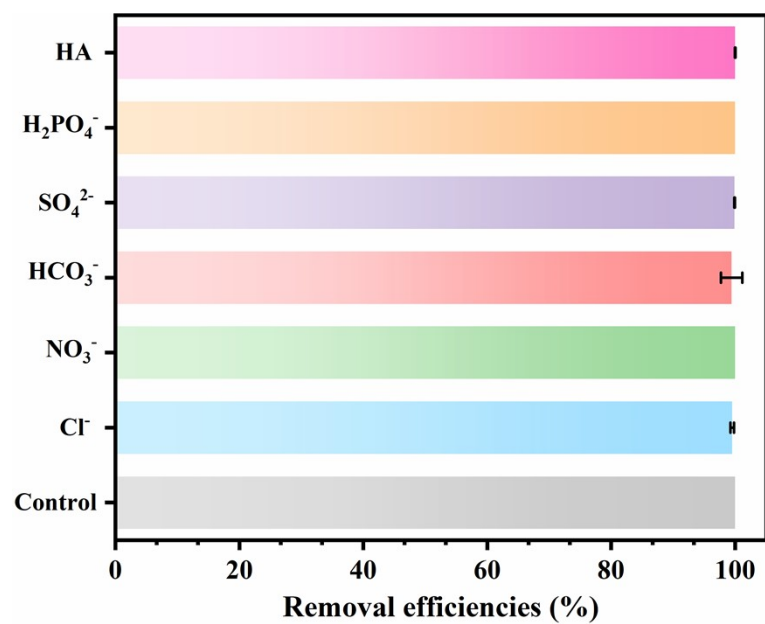

**Fig. S7** The influence of co-existing inorganic ions and organic matters on Cr(VI) removal efficiencies.

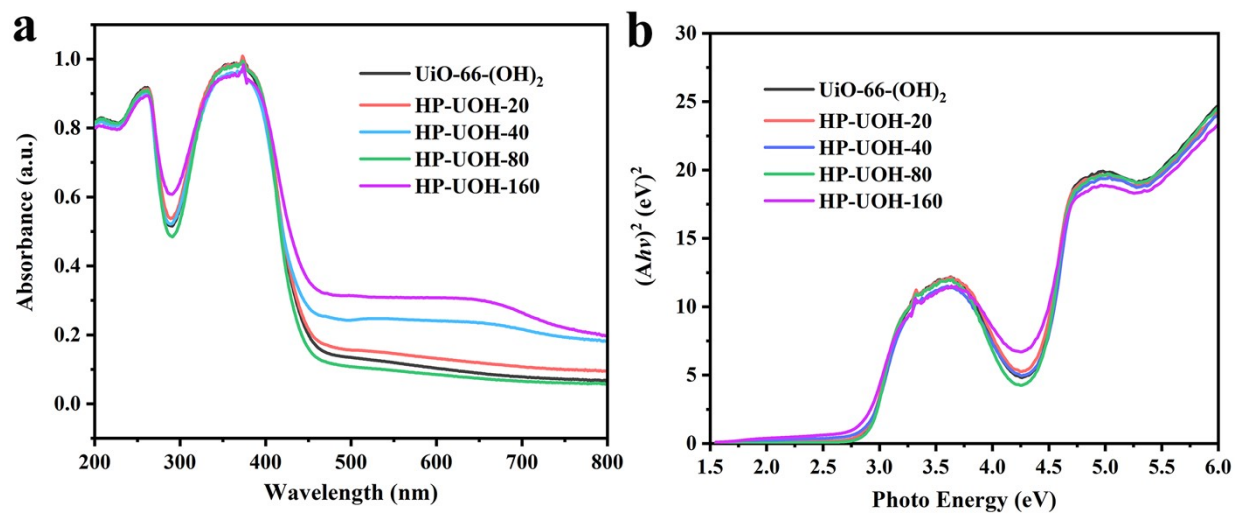

**Fig. S8** (a) The UV-vis DRS spectra and (b) the  $E_g$  plots of UiO-66-(OH)<sub>2</sub> and series HP-UOH-X.

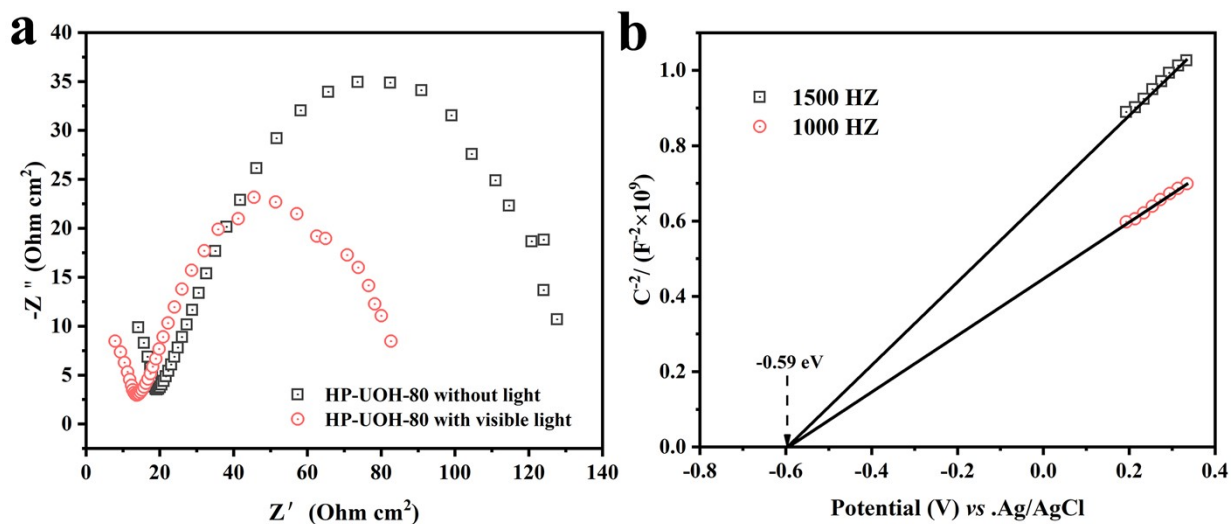

**Fig. S9** The (a) EIS analysis and (b) Mott-Schottky curves at different frequencies of HP-UOH-80.

Note: because the flat band potential was more positive 0.1 eV than the conduction band potential for n-typed semiconductor [1], the  $E_{\text{LUMO}}$  of HP-UOH-80 was calculated as  $-0.49$  eV vs. NHE.

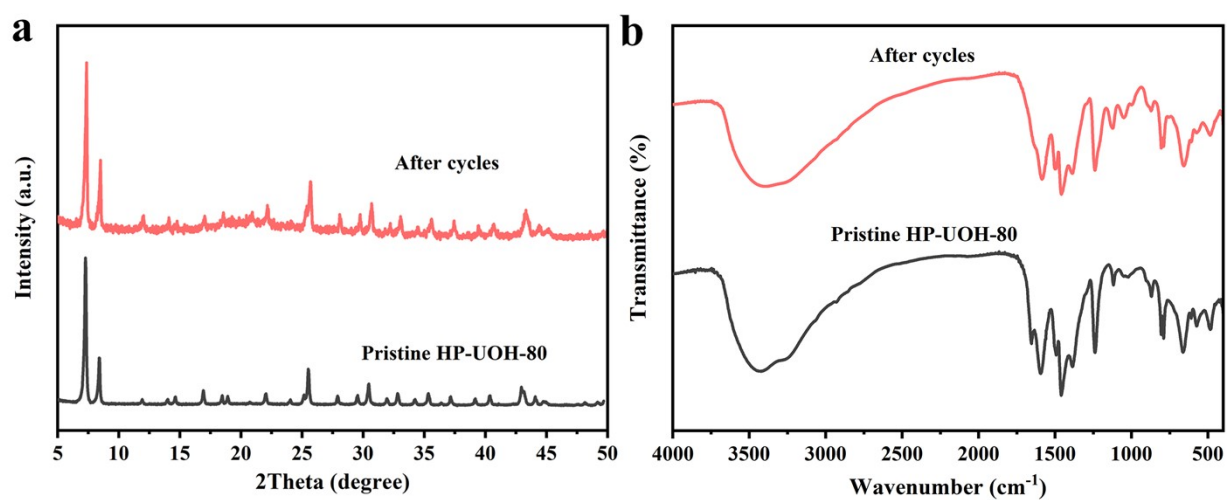

**Fig. S10** (a) The XRD patterns and (b) FTIR spectra of fresh HP-UOH-80 and used HP-UOH-80.

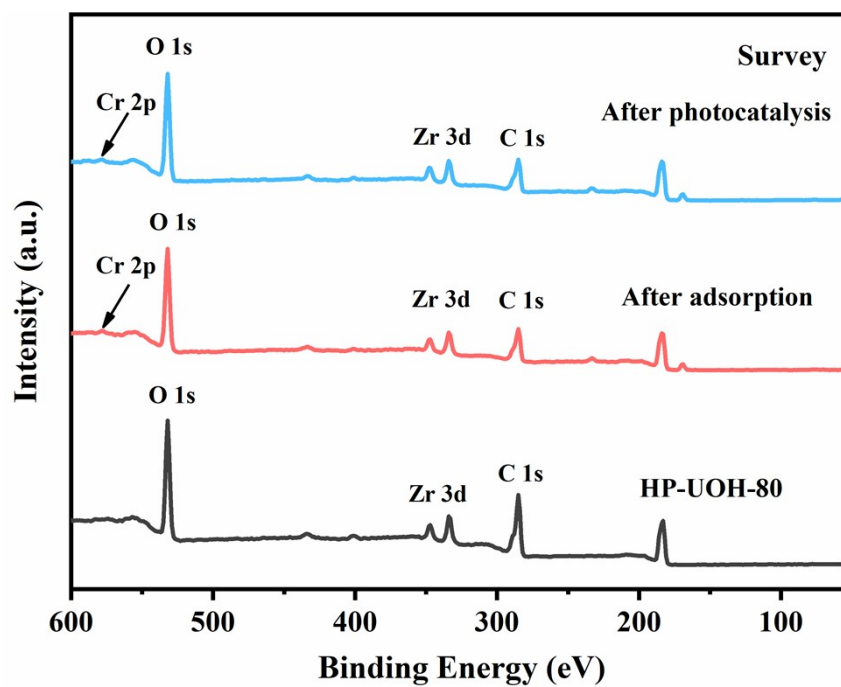

**Fig. S11** The XPS survey scan of HP-UOH-80 and its corresponding after adsorption and photocatalysis.



## References

- [1] C. Zhao, J. Wang, X. Chen, Z. Wang, H. Ji, L. Chen, W. Liu, C.C. Wang, Bifunctional  $\text{Bi}_{12}\text{O}_{17}\text{Cl}_2/\text{MIL-100}(\text{Fe})$  composites toward photocatalytic  $\text{Cr}(\text{VI})$  sequestration and activation of persulfate for bisphenol A degradation, *Sci. Total Environ.* 752 (2021) 141901.
